# Supplementary material for: Human Pressures on Natural Reserves in Yunnan Province and Management Implications
Source: PubMed Central journal article supplement (PMC5818542; doi:10.1038/s41598-018-21654-w), 2018-02-19
Supplement: 41598_2018_21654_MOESM1_ESM.pdf [file 41598_2018_21654_MOESM1_ESM.pdf]

# **Human Pressures on Natural Reserves in Yunnan Province and Management Implications**

Cheng Qiu<sup>1,2,3</sup>, Jinming Hu<sup>1,3,4\*</sup>, Feiling Yang<sup>1,3\*</sup>, Feng Liu<sup>1,3</sup> & Xinwang Li<sup>1,3</sup>

<sup>1</sup>Institute of International Rivers and Eco-security, Yunnan University, Kunming, Yunnan 650500, China. <sup>2</sup>School of Geography and Land Engineering, Yuxi Normal University, Yuxi, Yunnan 653100, China. <sup>3</sup>Yunnan Key Laboratory of International Rivers and Transboundary Ecoscience, Yunnan University, Kunming, Yunnan 650091, China. <sup>4</sup>Collaborative Innovation Center for Territorial Sovereignty and Maritime Rights, Wuhan, Hubei 430072, China

\*Correspondence and requests for materials should be addressed to J.H. (email: [hujm@ynu.edu.cn](mailto:hujm@ynu.edu.cn)) or F. Y. ([flyang@ynu.edu.cn](mailto:flyang@ynu.edu.cn))

## *Supplementary Tables*

*Supplementary Table S1.* The orders of NRs' ICHPI and ECHPI in Yunnan Province

*Supplementary Table S2.* Internal and external HPI classes of 58 NRs in Yunnan Province

| Natural reserves' name | ICHPI  | ICHPI grade | ICHPI rank | ECHPI  | ECHPI grade | ECHPI rank | Type    | Grade      |
|------------------------|--------|-------------|------------|--------|-------------|------------|---------|------------|
| Bitu Lake              | 0.0029 | slight      | 1          | 0.0146 | slight      | 1          | wetland | provincial |
| Yongde Snow Mountain   | 0.0335 | slight      | 2          | 0.6642 | light       | 25         | forest  | national   |
| Weiyuan River          | 0.0340 | slight      | 3          | 0.6151 | light       | 22         | plant   | provincial |
| Baima Snow Mountain    | 0.0380 | slight      | 4          | 0.1308 | slight      | 2          | animal  | national   |
| Gaoligong Mountain     | 0.0422 | slight      | 5          | 0.3909 | slight      | 11         | forest  | national   |
| Yunlong Tianchi Lake   | 0.0466 | slight      | 6          | 0.2836 | slight      | 5          | animal  | national   |
| Laiyang River          | 0.0476 | slight      | 7          | 0.3007 | slight      | 6          | forest  | provincial |
| Wuliang Mountain       | 0.0665 | slight      | 8          | 0.6614 | light       | 24         | animal  | national   |
| Diaoling Mountain      | 0.0670 | slight      | 9          | 0.3406 | slight      | 9          | forest  | provincial |
| Nangun River           | 0.0791 | slight      | 10         | 0.3967 | slight      | 13         | animal  | national   |
| Laojun Mountain        | 0.0960 | slight      | 11         | 0.5964 | light       | 21         | forest  | provincial |
| Yulong Snow Mountain   | 0.1142 | slight      | 12         | 0.2277 | slight      | 4          | forest  | provincial |
| Ailao Mountain         | 0.1294 | slight      | 13         | 0.6661 | light       | 26         | forest  | national   |
| Tongbiguan             | 0.1421 | slight      | 14         | 0.6829 | light       | 28         | forest  | provincial |
| Huanglian Mountain     | 0.1491 | slight      | 15         | 0.3835 | slight      | 10         | forest  | national   |
| Longling Xiaoheishan   | 0.1621 | slight      | 16         | 1.1143 | moderate    | 44         | forest  | provincial |
| Dawei Mountain         | 0.1731 | slight      | 17         | 0.4851 | light       | 16         | forest  | national   |
| Nanpeng River          | 0.1802 | slight      | 18         | 0.7666 | light       | 31         | forest  | provincial |
| Haba Snow Mountain     | 0.1841 | slight      | 19         | 0.3293 | slight      | 8          | forest  | provincial |
| Lugu Lake              | 0.2077 | slight      | 20         | 0.1739 | slight      | 3          | wetland | provincial |
| Yongping Golden Temple | 0.2082 | slight      | 21         | 0.4248 | slight      | 14         | forest  | provincial |
| Jiaozhi Snow Mountain  | 0.2413 | light       | 22         | 0.5830 | light       | 20         | forest  | national   |
| Xishuangbanna          | 0.2484 | light       | 23         | 0.6763 | light       | 27         | forest  | national   |
| Wumeng Mountain        | 0.2551 | light       | 24         | 0.8465 | light       | 34         | forest  | national   |

|                                         |        |          |    |        |          |    |         |            |
|-----------------------------------------|--------|----------|----|--------|----------|----|---------|------------|
| Tuoniang River                          | 0.2696 | light    | 25 | 0.4639 | slight   | 15 | forest  | provincial |
| Lancang River                           | 0.3192 | light    | 26 | 0.9047 | moderate | 35 | forest  | provincial |
| Yunling                                 | 0.3315 | light    | 27 | 0.3923 | slight   | 12 | forest  | provincial |
| Jinping Fenshuiling                     | 0.3367 | light    | 28 | 0.5006 | light    | 17 | forest  | national   |
| Shibalian Mountain                      | 0.3500 | light    | 29 | 1.0108 | moderate | 39 | forest  | provincial |
| Lao Mountain                            | 0.3665 | light    | 30 | 0.6993 | light    | 30 | forest  | provincial |
| Nuozhadu                                | 0.3887 | light    | 31 | 0.6420 | light    | 23 | forest  | provincial |
| Napa Lake                               | 0.4641 | light    | 32 | 3.0785 | severe   | 55 | wetland | provincial |
| Yuan River                              | 0.4755 | light    | 33 | 1.0831 | moderate | 41 | forest  | national   |
| Weishan Qinghua Green Peafowl           | 0.5366 | moderate | 34 | 1.0867 | moderate | 43 | animal  | provincial |
| Naban River                             | 0.5454 | moderate | 35 | 0.3175 | slight   | 7  | forest  | national   |
| Honghe Amu Mountain                     | 0.5697 | moderate | 36 | 1.0516 | moderate | 40 | forest  | provincial |
| Zixi Mountain                           | 0.5994 | moderate | 37 | 0.8416 | light    | 32 | forest  | provincial |
| Wenshan                                 | 0.6629 | moderate | 38 | 1.0863 | moderate | 42 | forest  | national   |
| Gulinqing                               | 0.7001 | moderate | 39 | 0.5326 | light    | 19 | forest  | provincial |
| Zhanyi Haifeng                          | 0.7579 | moderate | 40 | 0.9745 | moderate | 38 | wetland | provincial |
| Guanyin Mountain                        | 0.7703 | moderate | 41 | 1.2595 | moderate | 47 | forest  | provincial |
| Mojiang Xiqi <i>Alsophila spinulosa</i> | 0.8022 | moderate | 42 | 0.8450 | light    | 33 | plant   | provincial |
| Yao Mountain                            | 0.9430 | moderate | 43 | 1.2215 | moderate | 46 | forest  | national   |
| Menglian Mountain                       | 1.1547 | severe   | 44 | 0.5319 | light    | 18 | plant   | provincial |
| Xundian Black-necked Cranes             | 1.2255 | severe   | 45 | 0.9320 | moderate | 36 | animal  | provincial |
| Jiache                                  | 1.2397 | severe   | 46 | 1.1738 | moderate | 45 | plant   | provincial |
| Pear River's Source                     | 1.2618 | severe   | 47 | 2.4160 | severe   | 52 | forest  | provincial |
| Jian Lake                               | 1.2651 | severe   | 48 | 2.6379 | severe   | 53 | wetland | provincial |
| Huize Black-necked Cranes               | 1.3993 | severe   | 49 | 2.2034 | severe   | 51 | animal  | national   |

|                              |        |         |    |        |          |    |                    |            |
|------------------------------|--------|---------|----|--------|----------|----|--------------------|------------|
| Cang Mountain and Erhai Lake | 1.4822 | severe  | 50 | 8.6958 | extreme  | 57 | wetland/forest     | national   |
| Qiubei Puzhehei              | 1.5400 | severe  | 51 | 2.0021 | severe   | 50 | wetland            | provincial |
| Guangnan Babao               | 1.5490 | severe  | 52 | 0.6936 | light    | 29 | geological relicts | provincial |
| Dashanbao                    | 1.8659 | severe  | 53 | 1.7493 | moderate | 48 | wetland            | national   |
| Chengjiang Fossil Site       | 1.9132 | severe  | 54 | 2.9938 | severe   | 54 | geological relicts | provincial |
| Lashi Lake                   | 2.6893 | severe  | 55 | 3.1752 | severe   | 56 | wetland            | provincial |
| Jianshui Swallow Cave        | 3.4382 | extreme | 56 | 1.8930 | severe   | 49 | animal             | provincial |
| Jinning Meishucun            | 4.2177 | extreme | 57 | 9.8617 | extreme  | 58 | geological relicts | provincial |
| Tengchong Beihai Wetland     | 5.1281 | extreme | 58 | 0.9432 | moderate | 37 | wetland            | provincial |

*Supplementary Table S1.* The orders of NRs' ICHPI and ECHPI in Yunnan Province

| internal/external | HPI levels | PDPI           | GDPI           | HLUPI         | CHPI          |
|-------------------|------------|----------------|----------------|---------------|---------------|
| Internal          | slight     | 0.0000~0.1378  | 0.0000~0.2293  | 0.0000~0.3308 | 0.0000~0.2082 |
|                   | light      | 0.1379~0.4003  | 0.2294~0.5290  | 0.3309~0.7569 | 0.2083~0.4756 |
|                   | moderate   | 0.4004~1.1784  | 0.5291~2.1974  | 0.7570~1.2676 | 0.4757~0.9431 |
|                   | severe     | 1.1785~2.3513  | 2.1975~4.0601  | 1.2677~2.0572 | 0.9431~2.6893 |
|                   | extreme    | 2.3514~3.6724  | 4.0602~10.8282 | 2.0573~3.7653 | 2.6894~5.1281 |
| external          | slight     | 0.0000~0.5533  | 0.0000~0.5907  | 0.0000~0.5833 | 0.0000~0.4623 |
|                   | light      | 0.5534~1.1486  | 0.5908~1.9579  | 0.5834~1.0645 | 0.4624~0.8446 |
|                   | moderate   | 1.1487~2.2887  | 1.9580~4.1735  | 1.0646~1.6537 | 0.8447~1.7460 |
|                   | severe     | 2.2888~5.3133  | 4.1736~7.1491  | 1.6538~2.3869 | 1.7461~3.1730 |
|                   | extreme    | 5.3134~18.3776 | 7.1492~17.3933 | 2.3870~3.4829 | 3.1731~9.8575 |

*Supplementary Table S2.* Internal and external HPI classes of 58 NRs in Yunnan Province
